# Supplementary figures and images for: Long‐term efficacy and safety of dichlorphenamide for treatment of primary periodic paralysis
Source: PubMed Central journal article supplement — Muscle Nerve. 2021 Jul 9;64(3):342–6. doi: 10.1002/mus.27354 (PMC9290603; doi:10.1002/mus.27354), 2021-07-09

A

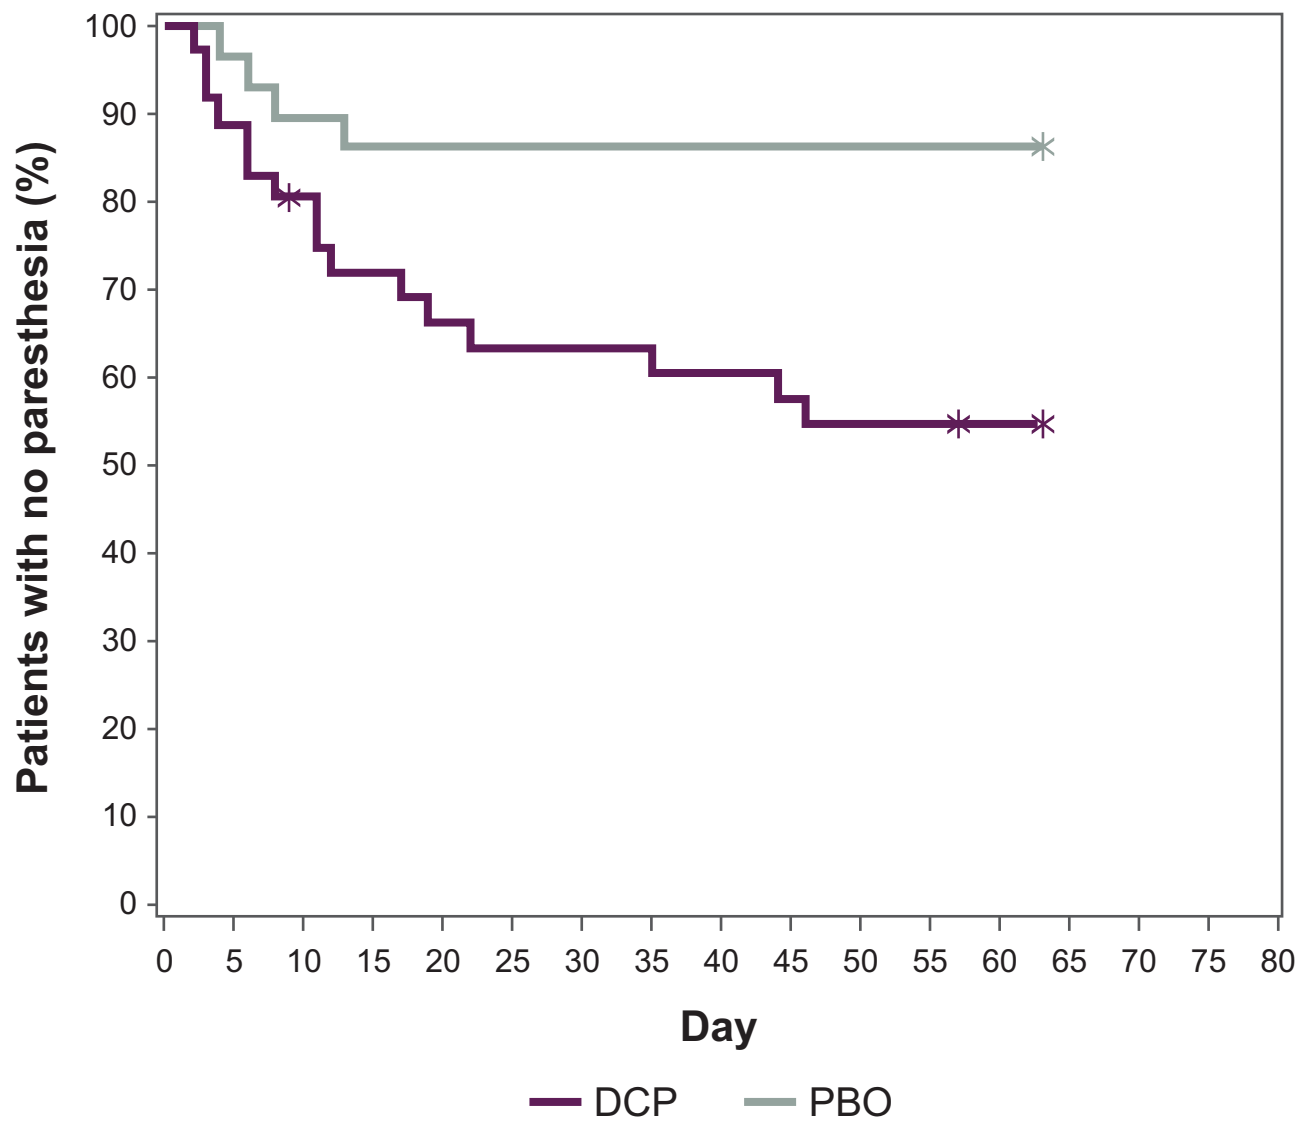

B

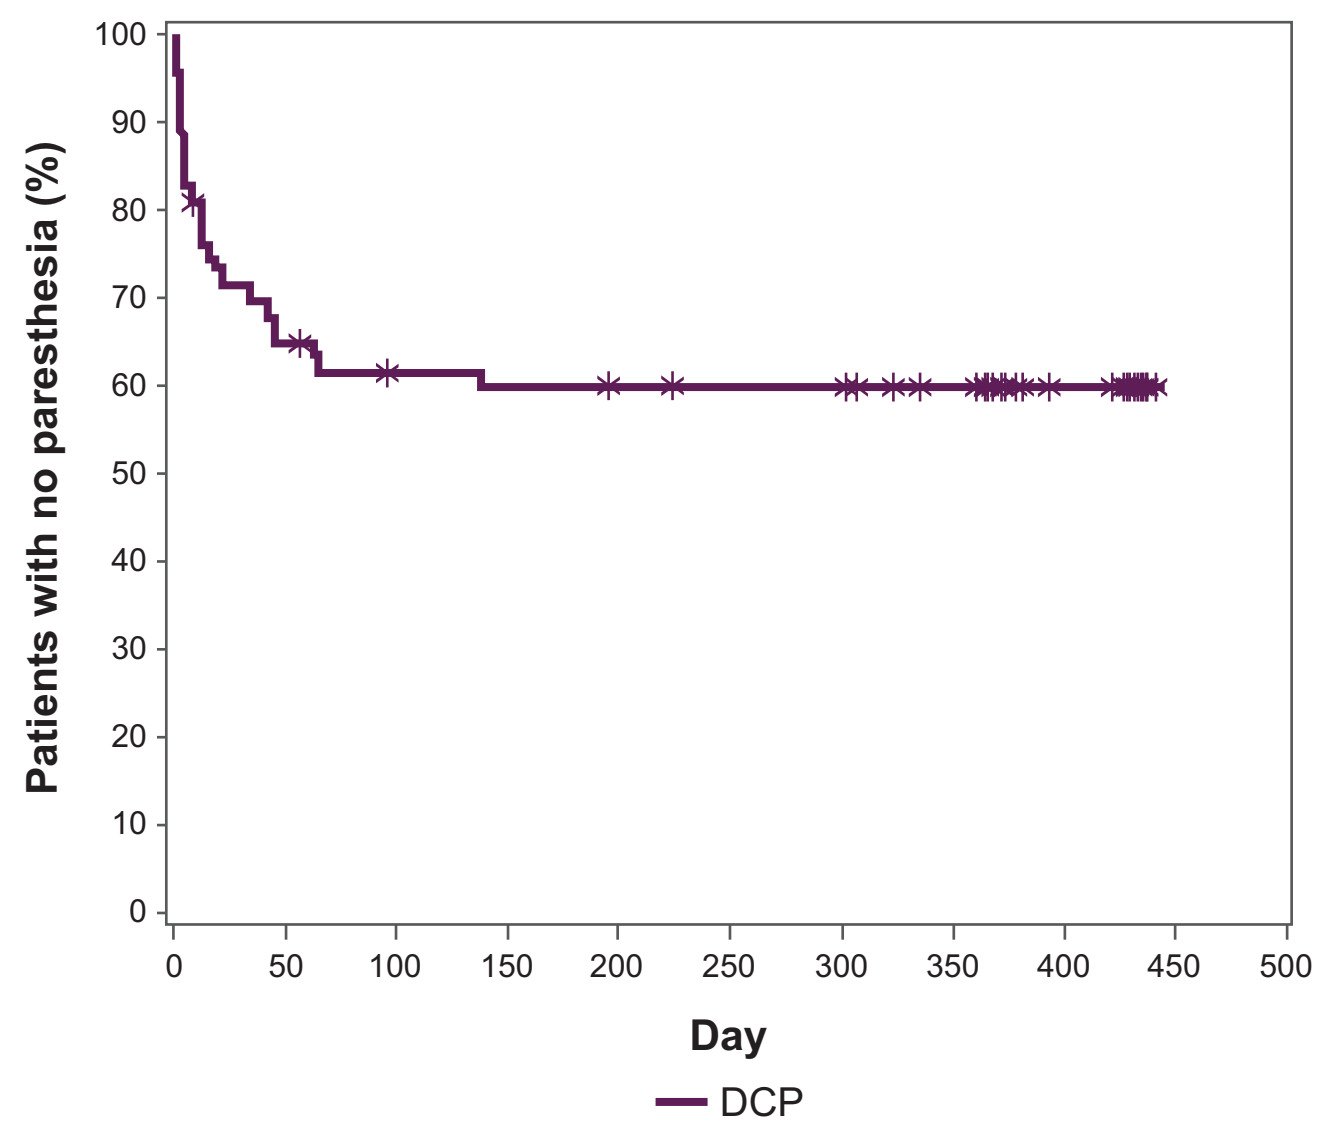

C

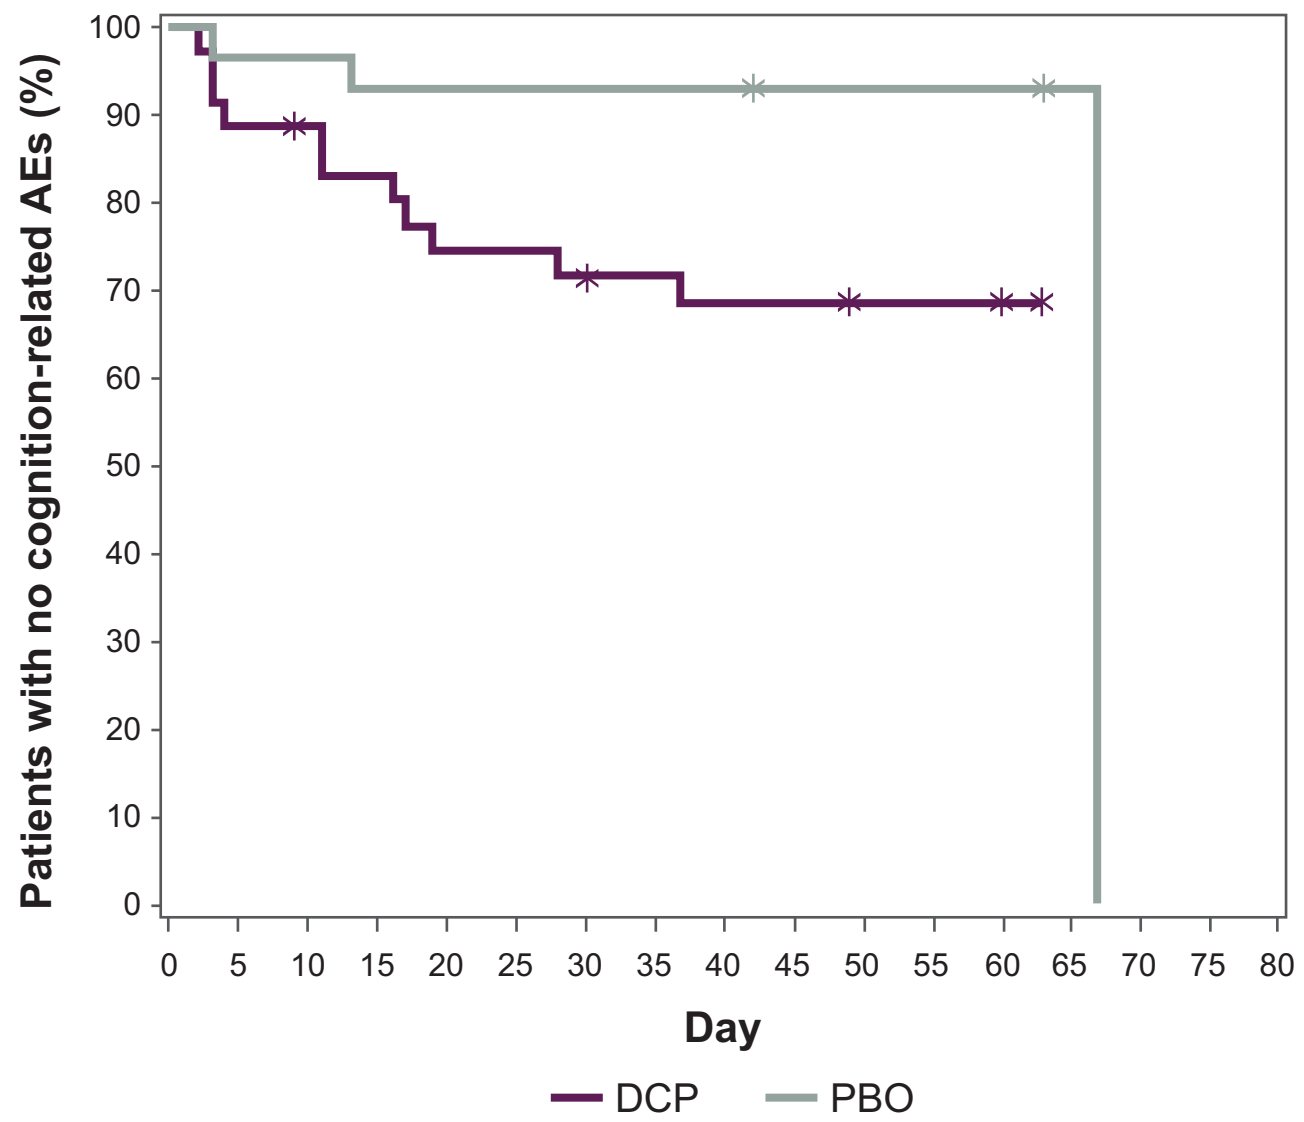

D

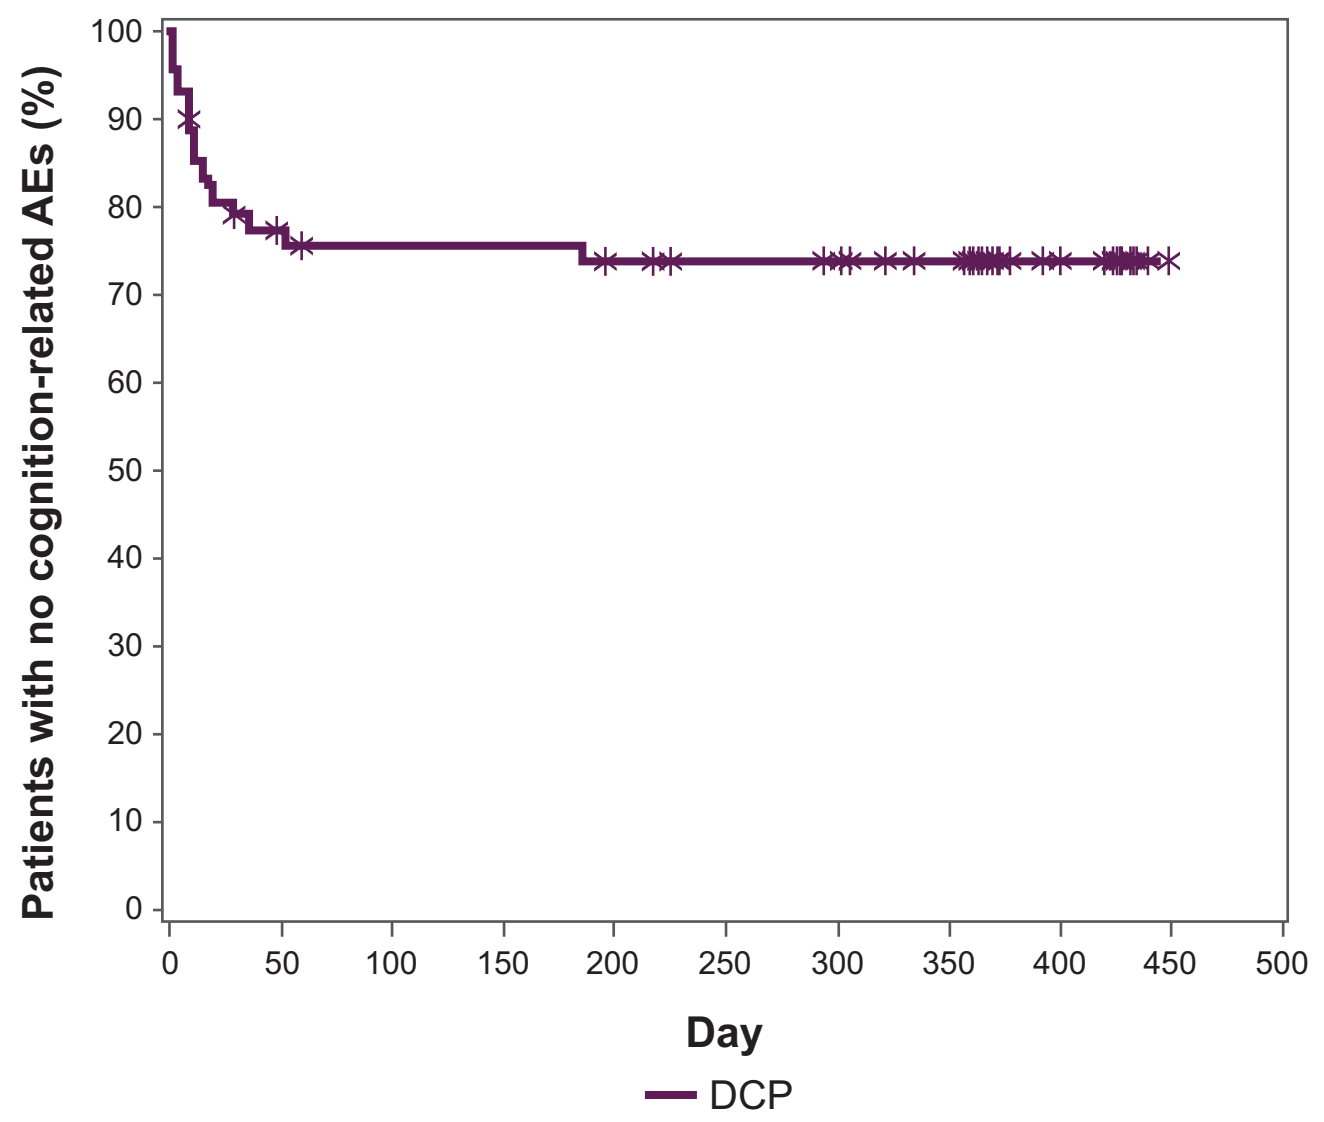

Supplement: MUS-64-342-s001.pdf [file MUS-64-342-s001.pdf]

**A**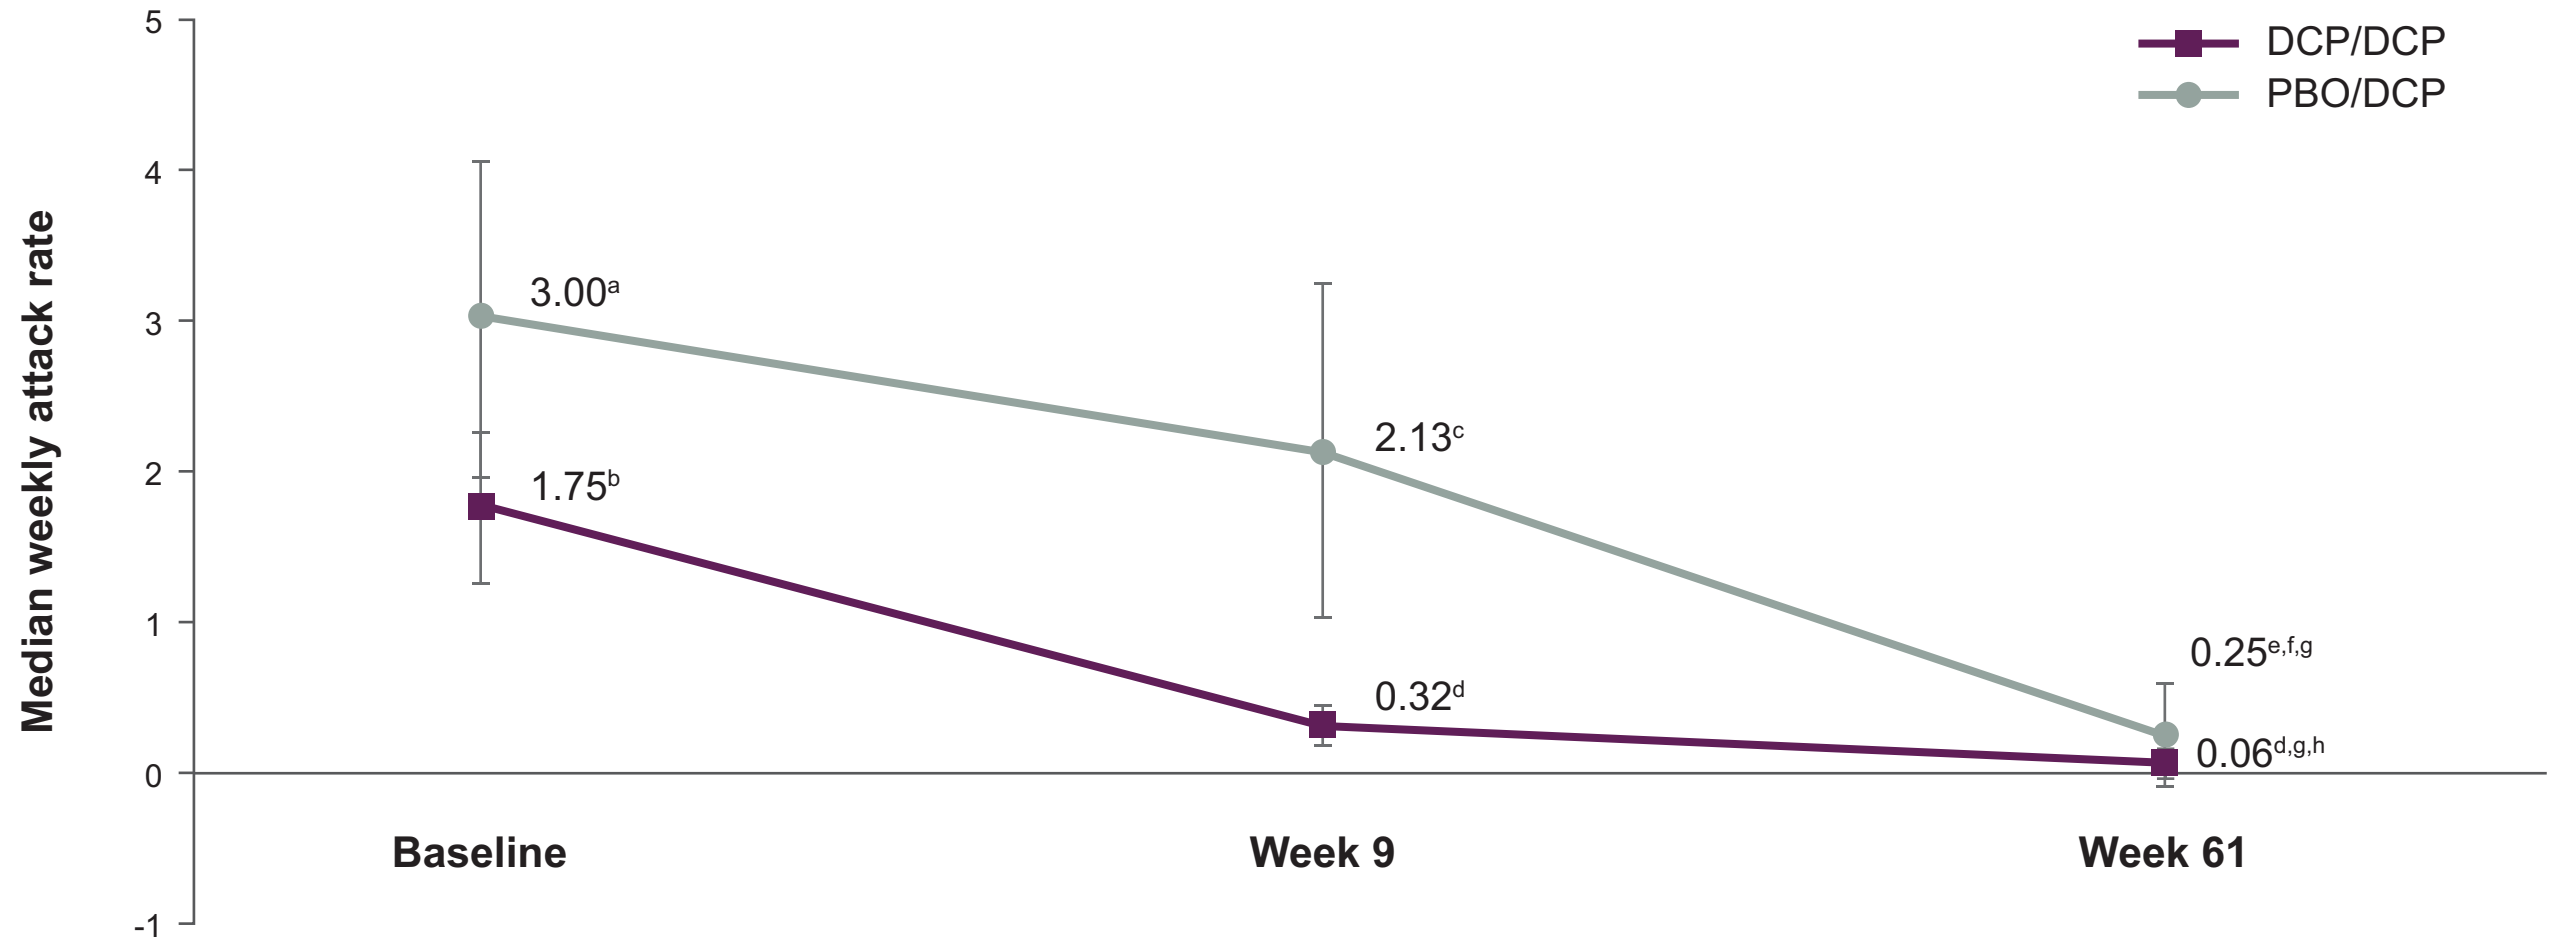**B**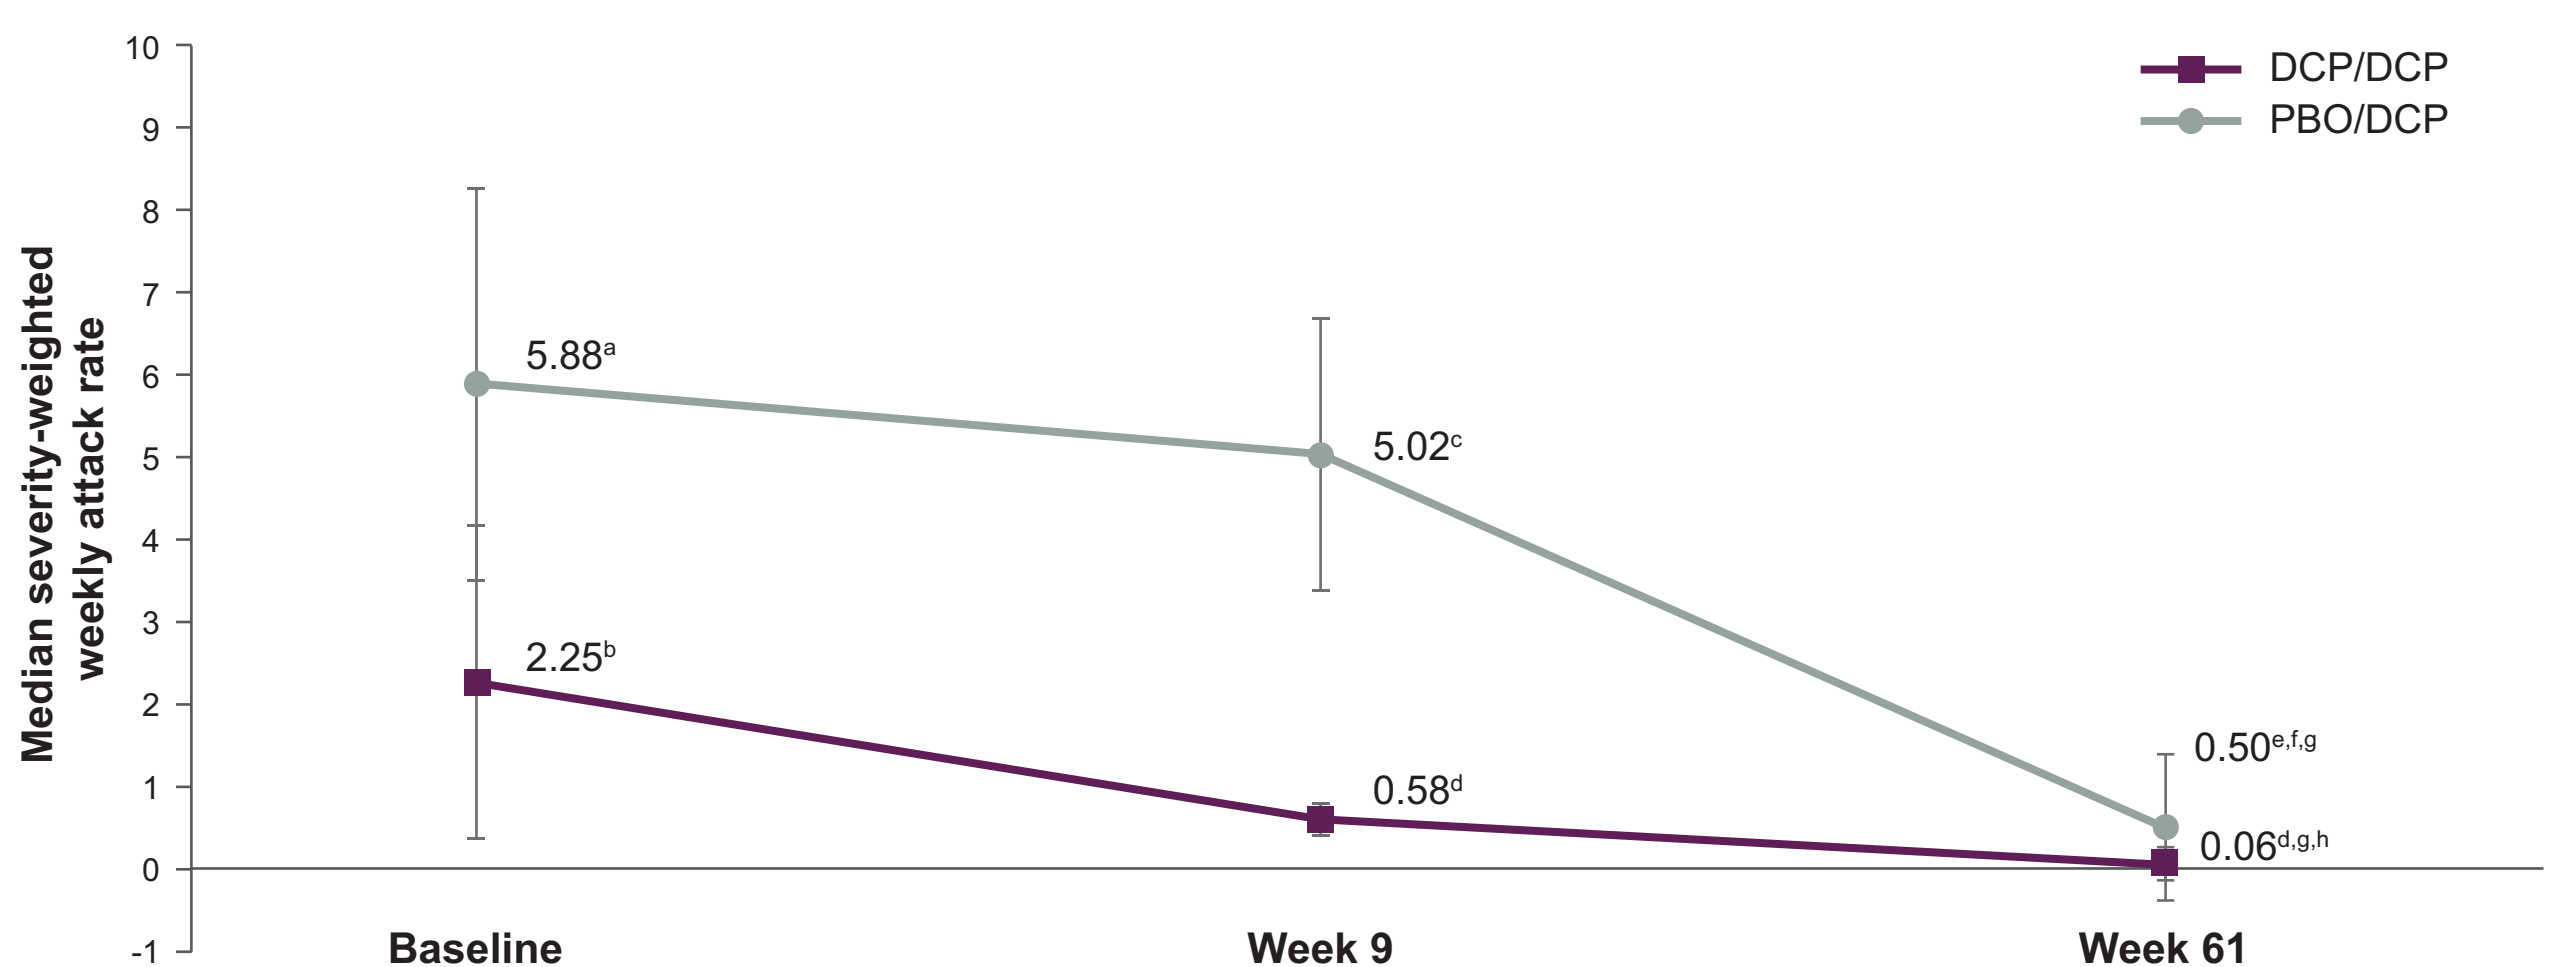

Supplement: MUS-64-342-s003.pdf [file MUS-64-342-s003.pdf]
